# Supplementary material for: Probiotic Properties and Potentiality of Lactiplantibacillus plantarum Strains for the Biological Control of Chalkbrood Disease
Source: MDPI journal article supplement (doi:10.3390/jof7050379), 2021-05-12
Supplement: s1 [file s1]

| <i>A.apis</i> strains | Matrices | Inhibition %           |                         |                        |                        |                        |
|-----------------------|----------|------------------------|-------------------------|------------------------|------------------------|------------------------|
|                       |          | LP8                    | LP25                    | LP86                   | LP95                   | LP100                  |
| DSM 3116              | BC       | 90.6±0.7 <sup>Dc</sup> | 92.4±0.5 <sup>Dc</sup>  | 61.5±2 <sup>Ca</sup>   | 60.0±1.9 <sup>Da</sup> | 75.3±1.5 <sup>Db</sup> |
|                       | CL       | 77.2±1.6 <sup>Cc</sup> | 84.7±0.6 <sup>Cd</sup>  | 81.8±1.4 <sup>Dd</sup> | 44.9±3.3 <sup>Cb</sup> | 38.8±2.8 <sup>Ba</sup> |
|                       | CP       | 43.7±2.8 <sup>Bb</sup> | 62.1±1.8 <sup>Bc</sup>  | 36.3±1.7 <sup>Ba</sup> | 37.8±1.5 <sup>Ba</sup> | 47.6±2.6 <sup>Cb</sup> |
|                       | CFS      | < 1 <sup>Aa</sup>      | < 1 <sup>Aa</sup>       | < 1 <sup>Aa</sup>      | < 1 <sup>Aa</sup>      | < 1 <sup>Aa</sup>      |
| DSM 3117              | BC       | 92.5±0.7 <sup>Dc</sup> | 100.0±0.0 <sup>Dd</sup> | 62.9±1.3 <sup>Da</sup> | 88.1±0.8 <sup>Db</sup> | 88.2±0.6 <sup>Db</sup> |
|                       | CL       | 70.5±1.8 <sup>Cb</sup> | 79.2±1.4 <sup>Cc</sup>  | 76.5±1.3 <sup>Cc</sup> | 70.4±1.8 <sup>Cb</sup> | 50.9±2.2 <sup>Ba</sup> |
|                       | CP       | 50.0±2.2 <sup>Ba</sup> | 69.8±1.7 <sup>Bc</sup>  | 57.4±1.6 <sup>Bb</sup> | 51.0±2.2 <sup>Ba</sup> | 57.3±1.7 <sup>Cb</sup> |
|                       | CFS      | 1.7±0.8 <sup>Aa</sup>  | 2.7±2.1 <sup>Aa</sup>   | 10.2±4 <sup>Ab</sup>   | 1.7±1.2 <sup>Aa</sup>  | 5.1±2.4 <sup>Aa</sup>  |

**Table S4.** Inhibition (radial growth %) against *A. apis* DSM 3116 and *A. apis* DSM 3117 on to MEA agar plates, after 8 day in aerobiosis, using broth culture (BC), cell pellet (CP), cell free supernatant (CFS) and cell lysate (CL) of *L. plantarum* strains. Results are shown as mean ± standard deviation (n=3). Different uppercase letters (A-H), in each column, and different lowercase letters (a-d), in each row, indicate significant differences (p < 0.05).
