# Supplementary material for: Probiotic Properties and Potentiality of Lactiplantibacillus plantarum Strains for the Biological Control of Chalkbrood Disease
Source: MDPI journal article supplement (doi:10.3390/jof7050379), 2021-05-12
Supplement: s1 [file s1]

| Biofilm production (OD <sub>580</sub> ) |                         |                               |                           |                           |                           |                           |
|-----------------------------------------|-------------------------|-------------------------------|---------------------------|---------------------------|---------------------------|---------------------------|
| Sugar Concentration                     | Environmental condition | LP8                           | LP25                      | LP86                      | LP95                      | LP100                     |
| Glucose                                 | Aerobiosis              | 5% 0.507±0.011 <sup>Ac</sup>  | 0.103±0.008 <sup>Aa</sup> | 0.220±0.021 <sup>Ab</sup> | 0.227±0.014 <sup>Ab</sup> | 0.219±0.016 <sup>Ab</sup> |
|                                         |                         | 10% 0.709±0.021 <sup>Cc</sup> | 0.108±0.005 <sup>Aa</sup> | 0.242±0.016 <sup>Ab</sup> | 0.230±0.019 <sup>Ab</sup> | 0.241±0.019 <sup>Ab</sup> |
|                                         |                         | 20% 0.778±0.010 <sup>Dd</sup> | 0.100±0.006 <sup>Aa</sup> | 0.298±0.020 <sup>Bc</sup> | 0.223±0.020 <sup>Ab</sup> | 0.297±0.014 <sup>Bc</sup> |
|                                         | Anaerobiosis            | 5% 0.609±0.012 <sup>Bd</sup>  | 0.154±0.008 <sup>Ba</sup> | 0.227±0.013 <sup>Ab</sup> | 0.207±0.019 <sup>Ab</sup> | 0.265±0.022 <sup>Bc</sup> |
|                                         |                         | 10% 0.782±0.047 <sup>Dc</sup> | 0.150±0.011 <sup>Ba</sup> | 0.232±0.011 <sup>Ab</sup> | 0.224±0.016 <sup>Ab</sup> | 0.263±0.013 <sup>Bb</sup> |
|                                         |                         | 20% 0.810±0.032 <sup>De</sup> | 0.152±0.008 <sup>Ba</sup> | 0.346±0.024 <sup>Cd</sup> | 0.238±0.019 <sup>Ab</sup> | 0.294±0.007 <sup>Bc</sup> |
| Fructose                                | Aerobiosis              | 5% 0.574±0.018 <sup>Ac</sup>  | 0.106±0.005 <sup>Aa</sup> | 0.221±0.020 <sup>Ab</sup> | 0.224±0.015 <sup>Ab</sup> | 0.216±0.009 <sup>Ab</sup> |
|                                         |                         | 10% 0.701±0.011 <sup>Bc</sup> | 0.125±0.008 <sup>Aa</sup> | 0.231±0.020 <sup>Ab</sup> | 0.232±0.018 <sup>Ab</sup> | 0.230±0.010 <sup>Ab</sup> |
|                                         |                         | 20% 0.795±0.008 <sup>Cd</sup> | 0.121±0.008 <sup>Aa</sup> | 0.234±0.013 <sup>Ab</sup> | 0.326±0.025 <sup>Bc</sup> | 0.231±0.008 <sup>Ab</sup> |
|                                         | Anaerobiosis            | 5% 0.765±0.024 <sup>Cd</sup>  | 0.112±0.011 <sup>Aa</sup> | 0.197±0.008 <sup>Ab</sup> | 0.296±0.009 <sup>Bc</sup> | 0.197±0.013 <sup>Ab</sup> |
|                                         |                         | 10% 0.735±0.024 <sup>Bd</sup> | 0.132±0.010 <sup>Aa</sup> | 0.223±0.012 <sup>Ab</sup> | 0.295±0.025 <sup>Bc</sup> | 0.295±0.017 <sup>Bc</sup> |
|                                         |                         | 20% 0.860±0.041 <sup>Dd</sup> | 0.143±0.009 <sup>Aa</sup> | 0.239±0.018 <sup>Bb</sup> | 0.294±0.009 <sup>Bc</sup> | 0.293±0.015 <sup>Bc</sup> |
| Sucrose                                 | Aerobiosis              | 5% 0.671±0.014 <sup>Ad</sup>  | 0.129±0.002 <sup>Aa</sup> | 0.220±0.006 <sup>Ab</sup> | 0.220±0.001 <sup>Ab</sup> | 0.374±0.015 <sup>Ac</sup> |
|                                         |                         | 10% 0.671±0.006 <sup>Ad</sup> | 0.137±0.006 <sup>Aa</sup> | 0.222±0.011 <sup>Ab</sup> | 0.230±0.011 <sup>Bb</sup> | 0.372±0.007 <sup>Ac</sup> |
|                                         |                         | 20% 0.684±0.015 <sup>Ad</sup> | 0.127±0.006 <sup>Aa</sup> | 0.209±0.015 <sup>Ab</sup> | 0.225±0.005 <sup>Bb</sup> | 0.397±0.012 <sup>Bc</sup> |
|                                         | Anaerobiosis            | 5% 0.778±0.012 <sup>Bd</sup>  | 0.157±0.005 <sup>Ba</sup> | 0.356±0.006 <sup>Bc</sup> | 0.197±0.012 <sup>Ab</sup> | 0.358±0.013 <sup>Ac</sup> |
|                                         |                         | 10% 0.807±0.008 <sup>Cc</sup> | 0.186±0.006 <sup>Ca</sup> | 0.352±0.020 <sup>Bb</sup> | 0.195±0.004 <sup>Aa</sup> | 0.357±0.018 <sup>Ab</sup> |
|                                         |                         | 20% 0.868±0.004 <sup>Dd</sup> | 0.189±0.007 <sup>Ca</sup> | 0.360±0.010 <sup>Bc</sup> | 0.236±0.009 <sup>Bb</sup> | 0.352±0.009 <sup>Ac</sup> |

**Table S5.** Biofilm production (expressed as OD value at 580 nm) of *L. plantarum* strains in MRS (aerobiosis and anaerobiosis conditions) with glucose, fructose, sucrose after incubation at 37° C for 24 h. Results are reported as mean ± standard deviation (n=3). For every sugar, different lowercase letters (a-c), in each row, and different uppercase letters (A-E), in each column, indicate significant differences (p < 0.05).
