# Supplementary material for: Probiotic Properties and Potentiality of Lactiplantibacillus plantarum Strains for the Biological Control of Chalkbrood Disease
Source: MDPI journal article supplement (doi:10.3390/jof7050379), 2021-05-12
Supplement: s1 [file s1]

| COMPOUNDS                     | g/L  |
|-------------------------------|------|
| D-Glucose                     | 5    |
| D-Fructose                    | 5    |
| Potassium dihydrogenphosphate | 2    |
| Sodium acetate                | 5    |
| Ammonium citrate tribasic     | 5    |
| Magnesium sulfate             | 0.2  |
| D-Ribose                      | 1    |
| D-Xylose                      | 1    |
| D-Maltose monohydrate         | 1    |
| DL -Malic acid                | 1    |
| L-Lysine monohydrate          | 0.1  |
| L -Histidine                  | 0.1  |
| L-Tyrosine                    | 0.1  |
| L-Phenylalanine               | 0.1  |
| L-Cysteine HCL monohydrate    | 0.1  |
| Glycine                       | 0.1  |
| Thiamine Hydrochloride        | 1    |
| Manganese (II) sulfate        | 0.05 |

**Table S2.** Letizia medium (LM) composition.
