# Supplementary material for: Probiotic Properties and Potentiality of Lactiplantibacillus plantarum Strains for the Biological Control of Chalkbrood Disease
Source: MDPI journal article supplement (doi:10.3390/jof7050379), 2021-05-12
Supplement: s1 [file s1]

| <i>A.apis</i><br>strains | Spore germination % |                   |                   |                   |                   |                   |
|--------------------------|---------------------|-------------------|-------------------|-------------------|-------------------|-------------------|
|                          | SG                  | SGL-LP8           | SGL-LP25          | SGL-LP86          | SGL-LP95          | SGL-P100          |
| <b>DSM 3116</b>          | 84±3 <sup>a</sup>   | 83±1 <sup>a</sup> | 80±3 <sup>a</sup> | 82±4 <sup>a</sup> | 78±5 <sup>a</sup> | 84±2 <sup>a</sup> |
| <b>DSM 3117</b>          | 75±5 <sup>a</sup>   | 70±3 <sup>a</sup> | 76±2 <sup>a</sup> | 75±6 <sup>a</sup> | 75±2 <sup>a</sup> | 78±6 <sup>a</sup> |

**Table S3.** Spore germination (%) in SG (spore/GLENN) and in SGL (spore/GLENN/LAB) mix. Results are shown as mean ± standard deviation (n=3). Different lowercase letters, in each row, indicate significant differences (p < 0.05).
