# Supplementary material for: Probiotic Properties and Potentiality of Lactiplantibacillus plantarum Strains for the Biological Control of Chalkbrood Disease
Source: MDPI journal article supplement (doi:10.3390/jof7050379), 2021-05-12
Supplement: s1 [file s1]

| Origin           | Strains | <i>A. apis</i> DSM 3116<br>(ZOI cm) | <i>A. apis</i> DSM 3117<br>(ZOI cm) |
|------------------|---------|-------------------------------------|-------------------------------------|
| Bee<br>bread     | LP5     | 0.80±0.06                           | 0.70±0.07                           |
|                  | LP25    | 2.20±0.10                           | 2.40±0.03                           |
|                  | LP36    | 0.60±0.06                           | 0.60±0.03                           |
|                  | LP39    | 0.70±0.06                           | 0.60±0.06                           |
|                  | LP 86   | 2.20±0.09                           | 2.10±0.05                           |
|                  | LP88    | 0.80±0.04                           | 0.90±0.07                           |
|                  | LP99    | 0.60±0.04                           | 0.60±0.05                           |
|                  | LP100   | 2.30±0.08                           | 2.50±0.09                           |
| Honey<br>stomach | LP8     | 2.60±0.07                           | 2.20±0.09                           |
|                  | LP22    | 0.90±0.08                           | 1.00±0.10                           |
|                  | LP28    | 0.60±0.05                           | 0.60±0.04                           |
|                  | LP30    | 0.70±0.06                           | 0.70±0.02                           |
|                  | LP55    | 0.60±0.04                           | 0.60±0.03                           |
|                  | LP59    | 0.60±0.05                           | 0.60±0.06                           |
|                  | LP75    | 0.60±0.06                           | 0.60±0.05                           |
|                  | LP81    | 0.80±0.07                           | 1.00±0.05                           |
|                  | LP90    | 0.80±0.07                           | 0.80±0.04                           |
|                  | LP91    | 0.70±0.05                           | 1.00±0.01                           |
|                  | LP95    | 2.10±0.07                           | 2.20±0.02                           |
|                  | LP109   | 0.60±0.04                           | 0.80±0.06                           |
| Mid<br>gut       | LP7     | 0.60±0.07                           | 0.60±0.04                           |
|                  | LP33    | 0.60±0.06                           | 0.90±0.03                           |

**Table S1.** List of 22 *L. plantarum* strains: origin and antifungal activity screening (zone inhibition diameter - ZOI cm), on to MEA agar plates, against *A. apis* DSM 3116 and *A. apis* DSM 3117. Results are shown as mean ± standard deviation (n=3).
